# Supplementary material for: Tuning charge transportation balance in quantum dot light emitting diodes by decreasing the mobility and conductivity of In-doped SnO 2 nanocrystal electron transport layers
Source: Royal Society of Chemistry journal article supplement (doi:10.1039/d5dt00211g), 2025-01-01
Supplement: d5dt00211g1.pdf [file d5dt00211g1.pdf]

## **Electronic Supplementary Information**

# **Tuning Charge Transportation Balance in Quantum Dot Light Emitting Diodes by Decreasing the Mobility and Conductivity of In-Doped SnO<sub>2</sub> Nanocrystal Electron Transport Layer**

Chen Lin, Mengxin Liu, Yuhui Liu, Xinan Shi<sup>\*</sup>, and Daocheng Pan<sup>\*</sup>

State Key Laboratory of Featured Metal Materials and Life-cycle Safety for Composite Structures;  
Guangxi Key Laboratory of Processing for Non-ferrous Metals and Featured Materials; MOE Key  
Laboratory of New Processing Technology for Nonferrous Metals and Materials; School of  
Resources, Environment and Materials, Guangxi University, Nanning 530004, China

<sup>\*</sup>E-mail: xashi@gxu.edu.cn and dcpan@gxu.edu.cn

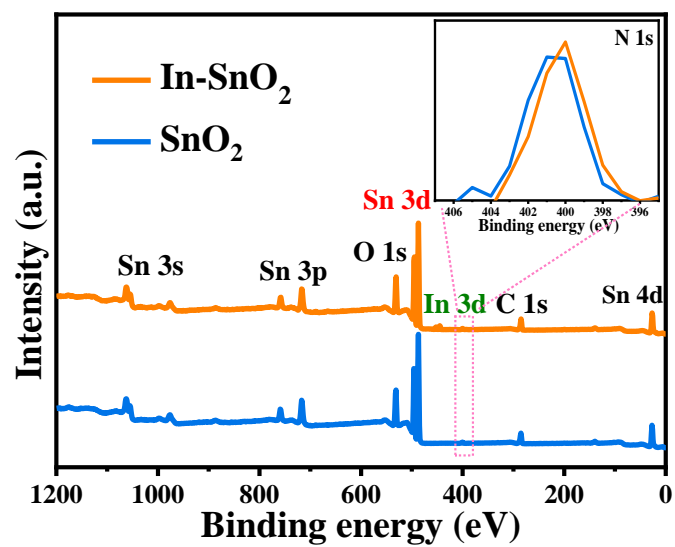

**Figure S1** XPS survey spectra of pristine SnO<sub>2</sub> and In-SnO<sub>2</sub> nanocrystals (inset: the XPS peaks of N1s).

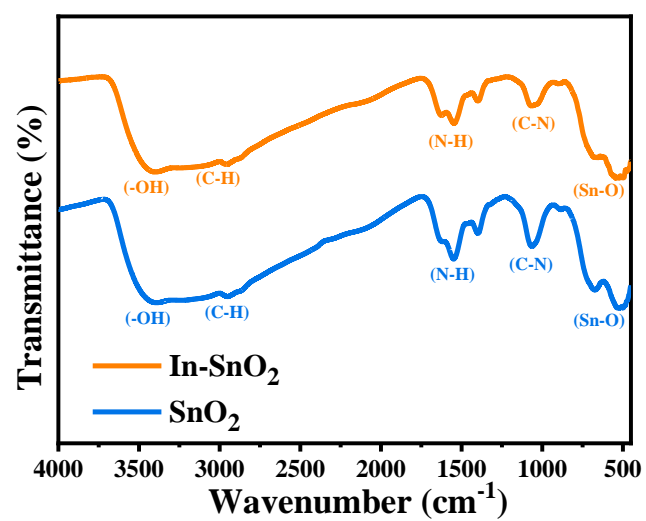

**Figure S2** FT-IR spectra of ethanolamine-capped SnO<sub>2</sub> nanocrystals before and after doping In<sup>3+</sup> ions.

**Table S1** Contents of Indium in In-SnO<sub>2</sub> nanocrystals from EDS analysis.

| <b>Sample</b>       | <b>Feeding doping concentrations (wt%)</b> | <b>Measured doping concentrations (wt%)</b> |
|---------------------|--------------------------------------------|---------------------------------------------|
| In-SnO <sub>2</sub> | 0                                          | 0                                           |
|                     | 2.5                                        | 2.13                                        |
|                     | 5                                          | 4.87                                        |
|                     | 7.5                                        | 7.66                                        |
|                     | 10                                         | 7.91                                        |

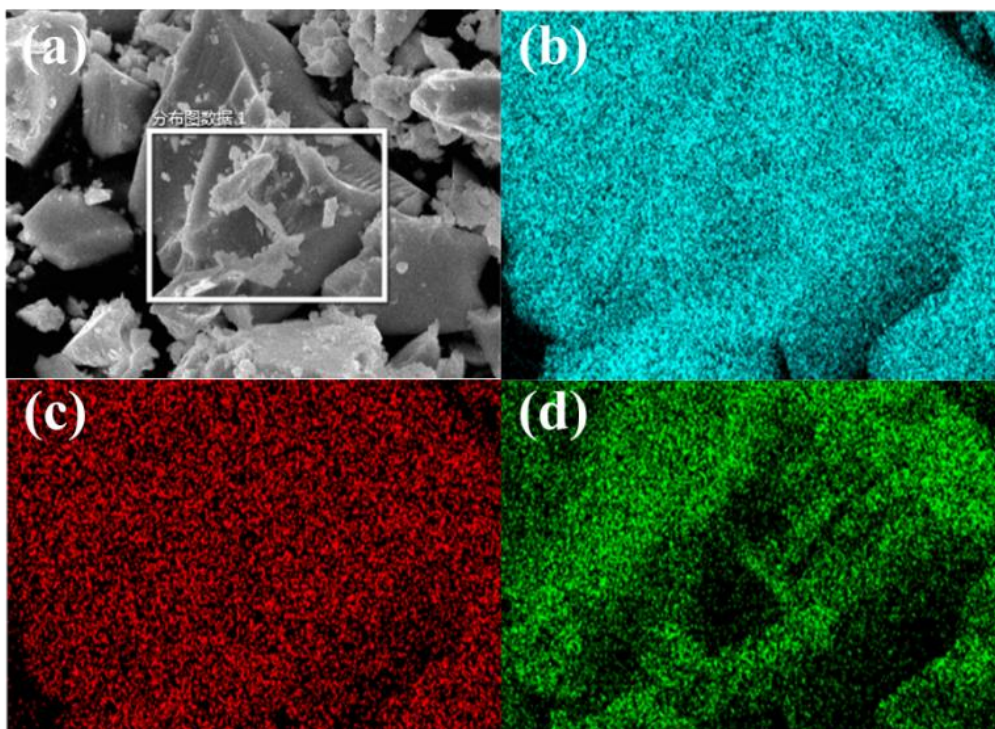

**Figure S3** SEM images of (a) In-SnO<sub>2</sub> nanocrystals and the corresponding EDS elemental mapping images of (b) Sn, (c) In and (d) O.

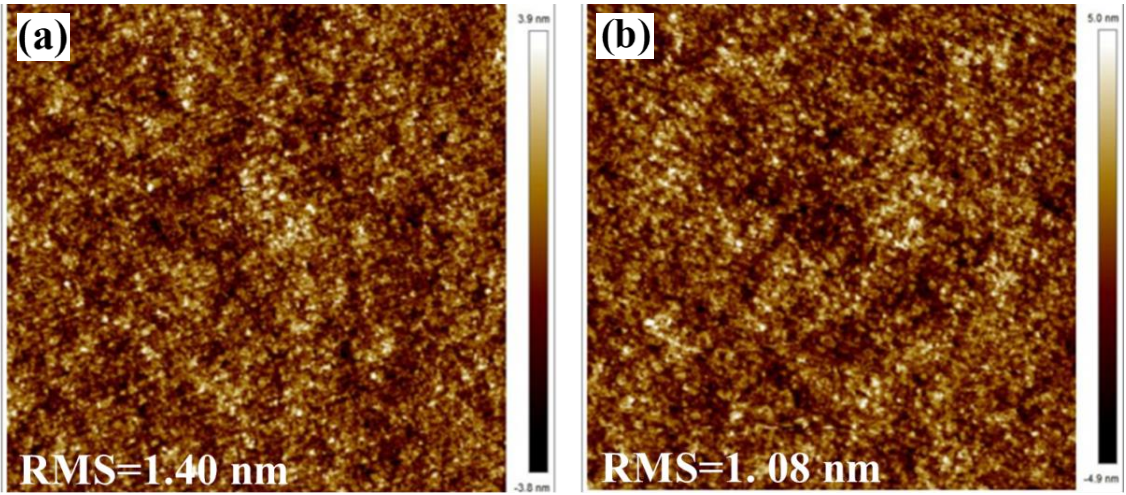

**Figure S4** AFM images and RMS roughness of (a) SnO<sub>2</sub> and (b) In-SnO<sub>2</sub> nanocrystal thin films.

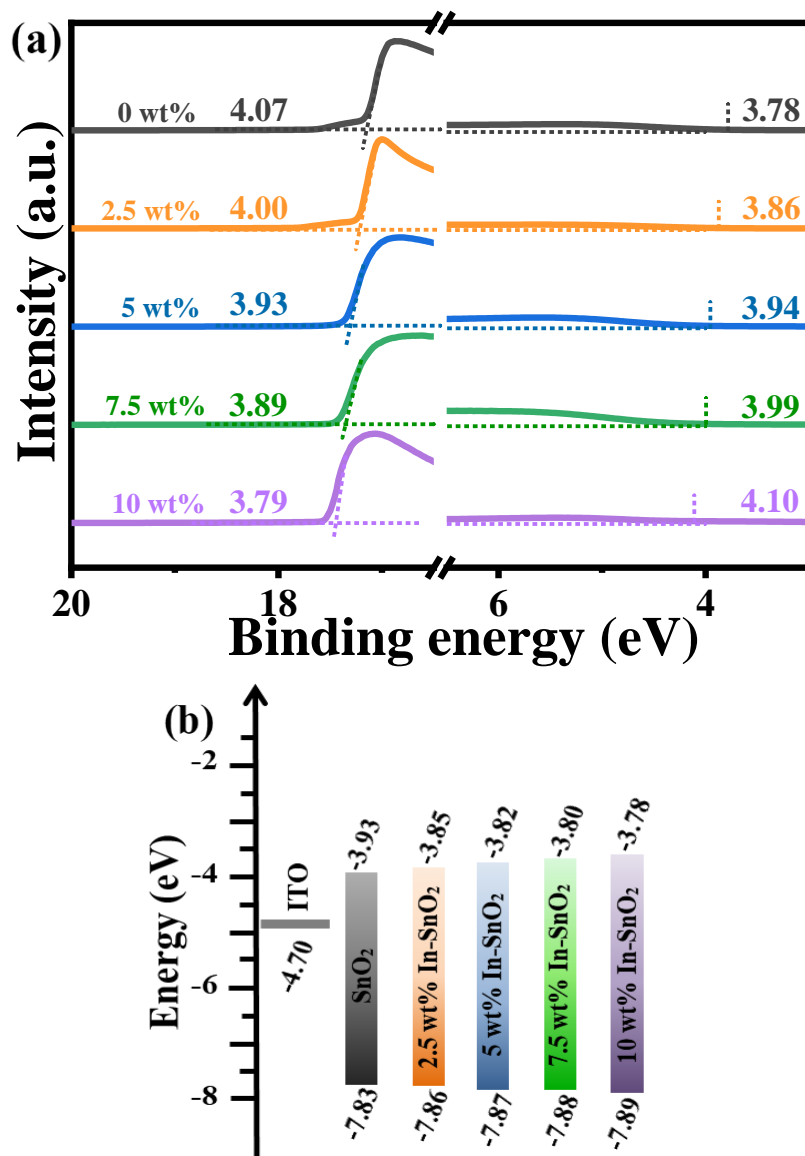

**Figure S5** (a) UPS spectra and (b) energy level diagrams of In-SnO<sub>2</sub> nanocrystal thin films doped with different In<sup>3+</sup> concentrations.

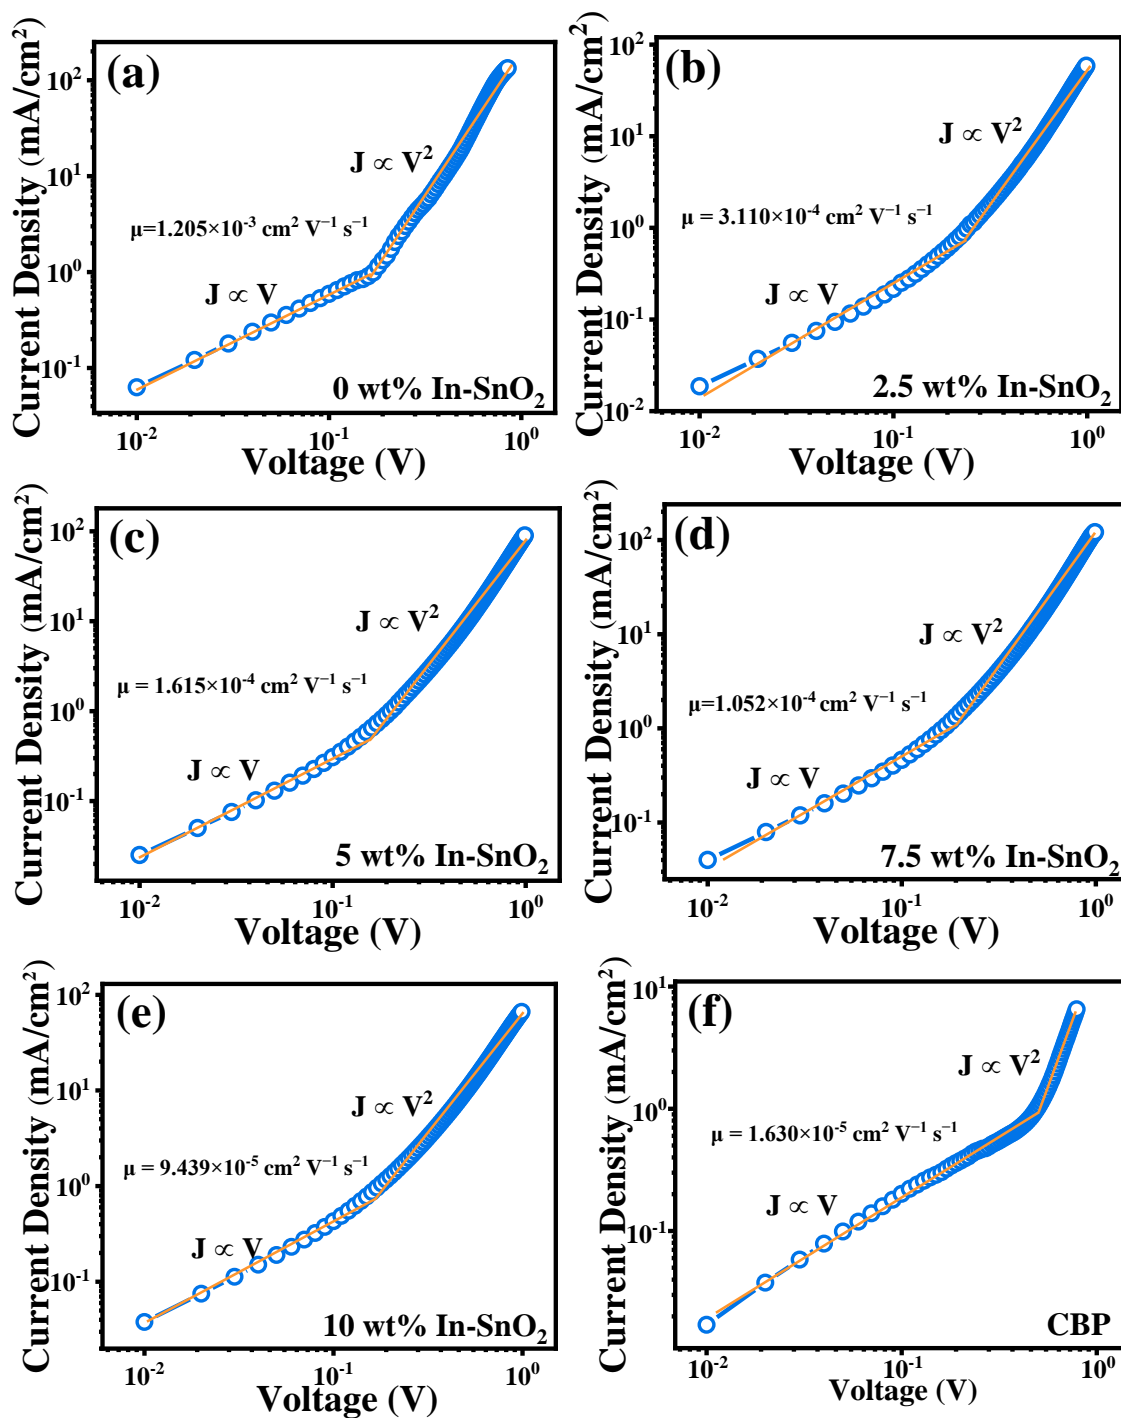

**Figure S6** Current density-voltage curves of (a-e) ITO/*x* wt% In-doped SnO<sub>2</sub> nanocrystal thin films (*x*=0, 2.5, 5, 7.5, 10)/Al devices and (f) ITO/CBP/MoO<sub>3</sub>/Al device.



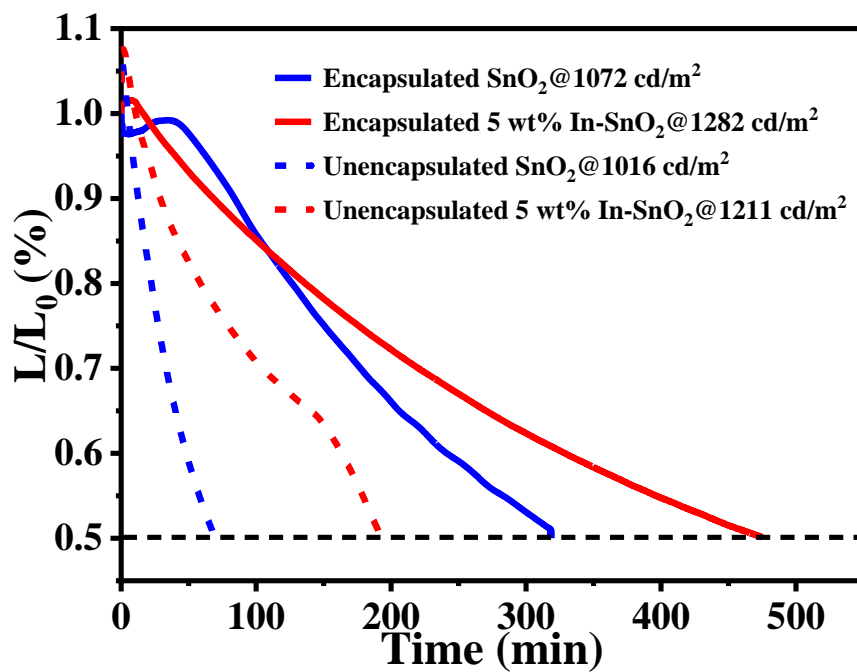

**Figure S7** Comparison of the device lifetimes of encapsulated and unencapsulated pristine  $\text{SnO}_2$  and In-doped  $\text{SnO}_2$ -based QLEDs.
